# Supplementary material for: Whole-genome sequence of a high-temperature edible mushroom Pleurotus giganteus (zhudugu)
Source: PubMed Central journal article supplement (PMC9424821; doi:10.3389/fmicb.2022.941889), 2022-08-16
Supplement: Data_Sheet_1.pdf [file Data_Sheet_1.pdf]

1 **Whole Genome Sequence of an High Temperature Edible**

2 **Mushroom *Pleurotus giganteus* (Zhudugu)**

3

4 Hailong Yu<sup>1†</sup>, Meiyang Zhang<sup>1†</sup>, Yating Sun<sup>1,2†</sup>, Qiaozhen Li<sup>1</sup>, Jianyu Liu<sup>1</sup>, Chunyan Song<sup>1</sup>, Xiaodong  
5 Shang<sup>1</sup>, Qi Tan<sup>1</sup>, Lujun Zhang<sup>1\*</sup> and Hao Yu<sup>3\*</sup>

6

7 <sup>1</sup>National Engineering Research Center of Edible Fungi, institute of Edible Fungi, Shanghai Academy of  
8 Agricultural Sciences, Shanghai, China, <sup>2</sup>College of Horticulture, Shenyang Agricultural University,  
9 Shenyang, Liaoning, China, <sup>3</sup>Shandong Provincial Key Laboratory of Applied Mycology, School of Life  
10 Sciences, Qingdao Agricultural University, Qingdao, Shandong, China

11

12

13

14

15 \* Correspondence: zhanglujun@saas.sh.cn (L.J.Z.); yuhao@qau.edu.cn (H.Y.) Tel: +86-532-5895-7640  
16 (H.Y.)

17 † These authors contributed equally to this work

18 Mailing address: 700 Changcheng Road, Chengyang District, Qingdao, Shandong Province, People's  
19 Republic of China

20 **Keywords:** *Pleurotus giganteus*; genome; edible mushroom; white-rot fungi; mating locus, CAZymes

21

22

23

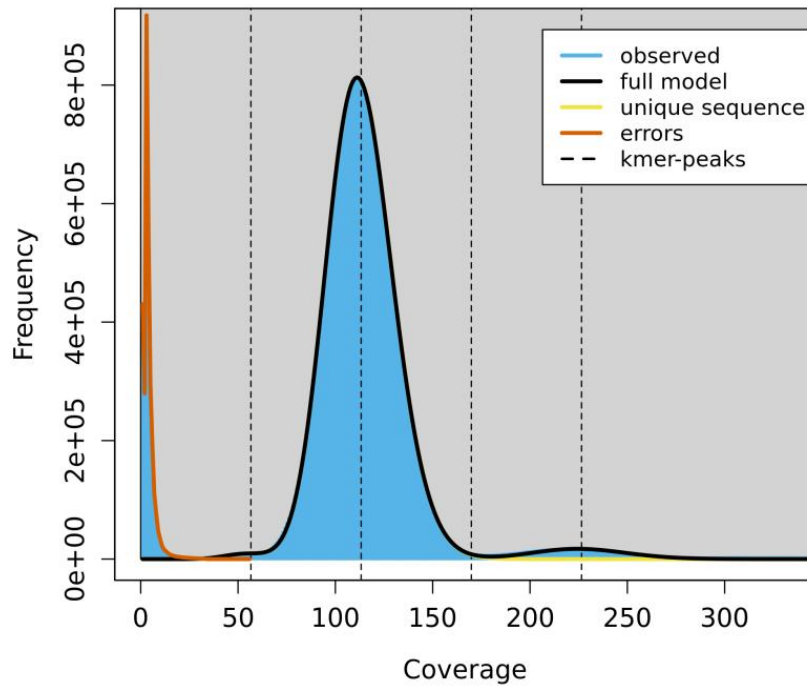

25

26 **Figure S1.** Histogram of the 19-mer depth distribution of the Illumina sequencing reads of *P. giganteus*  
 27 plotted in GenomeScope. Blue areas indicate the observed k-mer frequencies and the black line  
 28 indicates the fitted GenomeScope model ( $p = 2$ ).

29

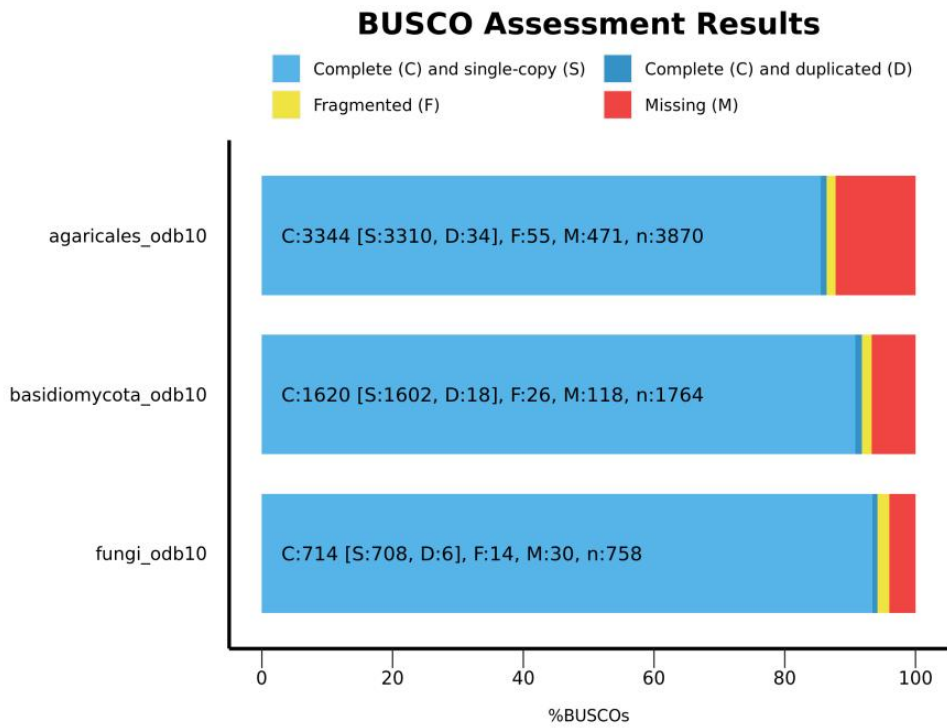

31

32 **Figure S2.** BUSCO assessment of the protein annotation completeness in *P. giganteus* with different  
33 BUSCO databases.

34

35

36 **Figure S3**

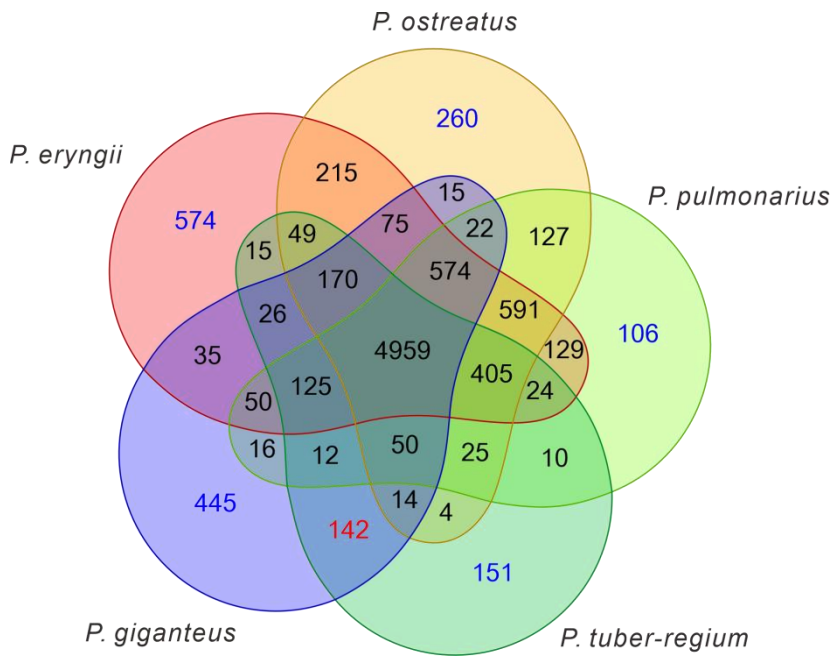

41 **Table S1** Characteristics of the gene prediction of *P. giganteus*

42

| Content                        | Number/length |
|--------------------------------|---------------|
| Gene number                    | 12628         |
| Average gene length            | 1761.11 bp    |
| Average protein length         | 586.04 aa     |
| Total exon number              | 90508         |
| Total exon/gene length         | 22239338 bp   |
| Average exon length            | 245.72 bp     |
| Average exon number per gene   | 7.17 bp       |
| Total intron number            | 77880         |
| Total intron length            | 23734624 bp   |
| Average intron length          | 304.76 bp     |
| Average intron number per gene | 6.17 bp       |

43

44
